# Supplementary material
Source: Elsevier journal article supplement (https://www.sciencedirect.com/science/article/pii/S253113792031289X)

Figure S-1: Exclusion of plasma cells and lymphoplasmacytic cells (violet) from B cell gate by successive gates (B-D). Normal BCP CD34+ (orange). Normal BCP CD34neg (blue). Normal mature B cells (green)


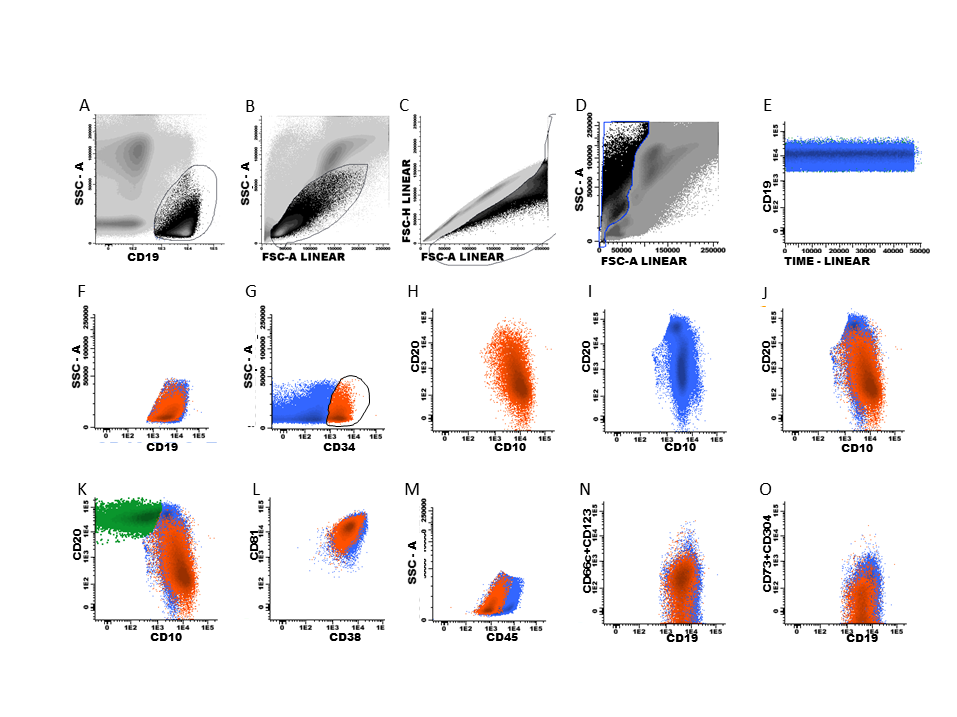


Figure S-2: Gating strategy to evaluate B cell maturation. Normal BCP CD34+ (orange). Normal BCP CD34neg (blue). Normal mature B cells (green)


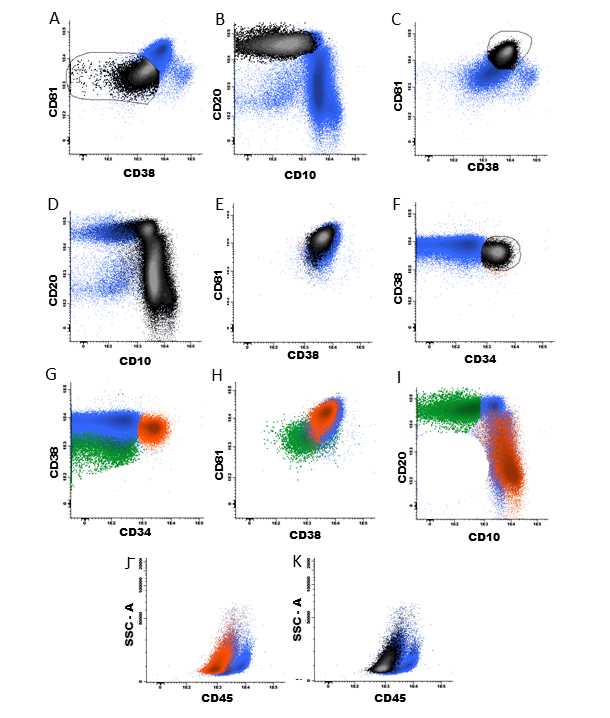


Figure S-3: Immunophenotype of CD19 negative BCP (pink) and CD19+ BCP (blue). CD34, CD38, CD45 and CD81 expression are the same for both, CD10 expression is weaker and CD20 may be slightly positive compared to their CD19 + counterparts.


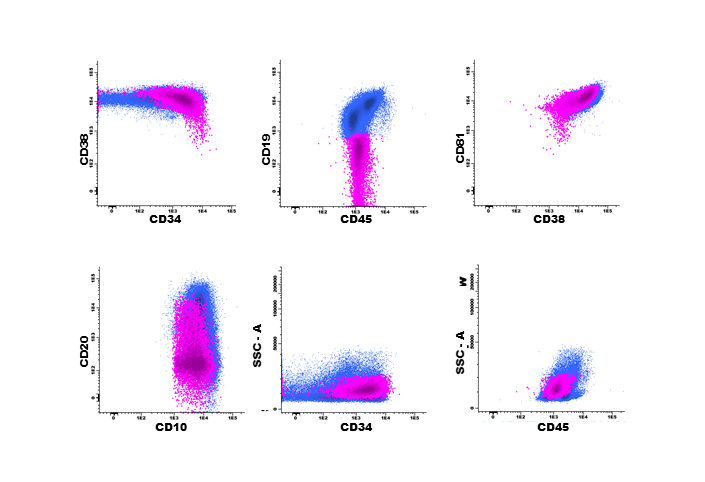

Supplement: mmc1 [file S253113792031289X:mmc1.docx]
